1 **Title: An accessible, efficient and global approach for the large-scale**  
2 **sequencing of bacterial genomes**

3 Blanca M. Perez-Sepulveda<sup>1\*#</sup>, Darren Heavens<sup>2\*</sup>, Caisey V. Pulford<sup>1\*</sup>, Alexander V. Predeus<sup>1</sup>,  
4 Ross Low<sup>2</sup>, Hermione Webster<sup>1</sup>, Christian Schudoma<sup>2</sup>, Will Rowe<sup>1,6</sup>, James Lipscombe<sup>2</sup>, Chris  
5 Watkins<sup>2</sup>, Benjamin Kumwenda<sup>7</sup>, Neil Shearer<sup>2</sup>, Karl Costigan<sup>1</sup>, Kate S. Baker<sup>1</sup>, Nicholas A.  
6 Feasey<sup>3,4</sup>, Jay C. D. Hinton<sup>1#</sup>, Neil Hall<sup>2,5#</sup> & The 10KSG consortium<sup>‡</sup>

7 <sup>1</sup>Institute of Integrative Biology, University of Liverpool, Liverpool, UK

8 <sup>2</sup>Earlham Institute, Norwich Research Park, Norwich, UK

9 <sup>3</sup>Liverpool School of Tropical Medicine, Pembroke Place, Liverpool, UK

10 <sup>4</sup>Malawi-Liverpool-Wellcome Programme, Blantyre, Malawi

11 <sup>5</sup>School of Biological Sciences, University of East Anglia, Norwich, UK

12 <sup>6</sup>University of Birmingham, Birmingham, UK

13 <sup>7</sup>College of Medicine, University of Malawi, Blantyre, Malawi

14 <sup>‡</sup>The 10KSG consortium names and affiliations are listed at the end of this article

15 \*These authors contributed equally

16 #For correspondence:

17 E-mail: [blanca.m.perez@gmail.com](mailto:blanca.m.perez@gmail.com)

18 E-mail: [neil.hall@earlham.ac.uk](mailto:neil.hall@earlham.ac.uk)

19 E-mail: [jay.hinton@liverpool.ac.uk](mailto:jay.hinton@liverpool.ac.uk)

## 20 **Abstract**

21 We have developed an efficient and inexpensive pipeline for streamlining large-scale  
22 collection and genome sequencing of bacterial isolates. Evaluation of this method involved a  
23 worldwide research collaboration focused on the model organism *Salmonella enterica*, the  
24 10KSG consortium. By optimising a logistics pipeline that collected isolates as thermolysates,  
25 permitting shipment in ambient conditions, the project assembled a diverse collection of  
26 10,419 clinical and environmental isolates from low- and middle-income countries in less than  
27 one year. The bacteria were obtained from 51 countries/territories dating from 1949 to 2017,  
28 with a focus on Africa and Latin-America. All isolates were collected in barcoded tubes and  
29 genome sequenced using an optimised DNA extraction method and the LITE pipeline for  
30 library construction. After Illumina sequencing, the total reagent cost was less than USD\$10  
31 per genome. Our method can be applied to genome-sequence other large bacterial collections  
32 at a relatively low cost, within a limited timeframe, to support global collaborations.

## 33 **Introduction**

34 Whole genome sequencing (WGS) is an important tool that has revolutionised our  
35 understanding of bacterial disease over the past decade<sup>1-4</sup>. Recognising the immense  
36 advantages that WGS data provides for surveillance, functional genomics and population  
37 dynamics, both public health and research communities have adopted genome-based  
38 approaches.

39 Until recently, large-scale bacterial genome projects could only be performed in a handful of  
40 sequencing centres around the world. Here, we aimed to make this technology accessible to  
41 bacterial laboratories worldwide. The high demand for sequencing human genomes has  
42 driven down the costs of sequencing reagents to below USD\$1,000 per sample<sup>5-7</sup>. However,  
43 the genome sequencing of thousands of microorganisms has remained expensive due to  
44 costs associated with sample transportation and library construction.

45 The number of projects focused on sequencing the genomes of collections of key pathogens  
46 has increased markedly over recent years. Whilst the first *Vibrio cholerae* next-generation  
47 WGS study was based on 23 genomes<sup>8</sup>, a recent study involved 1,070 isolates from 45 African  
48 countries<sup>9</sup> and identified the origin of the most recent cholera pandemic. *Mycobacterium*  
49 *tuberculosis*, another major human pathogen, was originally sequenced on the 100-isolate  
50 scale in 2010<sup>10</sup>, whilst recent publications used 3,651<sup>11</sup> or 10,209<sup>12</sup> genomes to evaluate the  
51 accuracy of antibiotic resistance prediction. Other successful large-scale next-generation  
52 WGS projects for pathogens include *Salmonella*, *Shigella*, *Staphylococcus*, and  
53 pneumococcus (*Streptococcus pneumoniae*)<sup>13-16</sup>.

54 One of the most significant challenges facing scientific researchers in low- and middle-income  
55 (LMI) countries is the streamlining of surveillance with scientific collaborations. For a  
56 combination of reasons, the regions associated with the greatest burden of severe bacterial  
57 disease have inadequate access to WGS technology and usually have to rely on expensive  
58 and bureaucratic processes for sample transport and sequencing. This has prevented the  
59 adoption of large-scale genome sequencing and analysis of bacterial pathogens for public  
60 health and surveillance in LMI countries<sup>17</sup>. Here, we have established an efficient and relatively  
61 inexpensive pipeline for the worldwide collection and sequencing of bacterial genomes. To  
62 evaluate our pipeline, we used the model organism *Salmonella enterica*, a pathogen with a  
63 global significance<sup>18</sup>.

64 Non-typhoidal *Salmonella* (NTS) are widely associated with enterocolitis in humans, a  
65 zoonotic disease that is linked to the industrialisation of food production. Because of the scale  
66 of human cases of enterocolitis and concerns related to food safety, more genome sequences  
67 have been generated for *Salmonella* than for any other genus. The number of publically  
68 available sequenced *Salmonella* genomes will soon reach 300,000<sup>19</sup>, and are available from  
69 several public repositories such as the European Nucleotide Archive (ENA,  
70 <https://www.ebi.ac.uk/ena>), the Sequence Read Archive (SRA,

71 <https://www.ncbi.nlm.nih.gov/sra>), and Enterobase  
72 (<https://enterobase.warwick.ac.uk/species/index/senterica>). However, there has been limited  
73 genome-based surveillance of foodborne infections in LMI countries, and the available  
74 genomic dataset does not accurately represent the *Salmonella* pathogens that are currently  
75 causing disease across the world.

76 In recent years, new lineages of NTS serovars Typhimurium and Enteritidis have been  
77 recognised as common causes of invasive bloodstream infections (iNTS disease), responsible  
78 for about 77,000 deaths per year worldwide<sup>20</sup>. Approximately 80% of deaths due to iNTS  
79 disease occurs in sub-Saharan Africa, where iNTS disease has become endemic<sup>21</sup>. The new  
80 *Salmonella* lineages responsible for bloodstream infections of immunocompromised  
81 individuals are characterised by genomic degradation, altered prophage repertoires and novel  
82 multidrug resistant plasmids<sup>22,23</sup>.

83 We saw a need to simplify and expand genome-based surveillance of salmonellae from Africa  
84 and other parts of the world, involving isolates associated with invasive disease and  
85 gastroenteritis in humans, and extended to bacteria derived from animals and the  
86 environment. We optimised a pipeline for streamlining the large-scale collection and  
87 sequencing of samples from LMI countries with the aim of facilitating access to WGS and  
88 worldwide collaboration. Our pipeline represents a relatively inexpensive and robust tool for  
89 the generation of bacterial genomic data from LMI countries, allowing investigation of the  
90 epidemiology, drug resistance and virulence factors of isolates.

## 91 **Results**

### 92 ***Development of an optimised logistics pipeline***

93 The “10,000 *Salmonella* genomes” (10KSG; <https://10k-salmonella-genomes.com/>) is a global  
94 consortium that includes collaborators from 25 institutions and a variety of settings, including  
95 research and reference laboratories across 16 countries. Limited funding resources prompted

96 us to design an approach that ensured accurate sample tracking and captured comprehensive  
97 metadata for individual bacterial isolates whilst minimising costs for the consortium. A key  
98 driver was to assemble a set of genomic data that would be as informative and robust as  
99 possible.

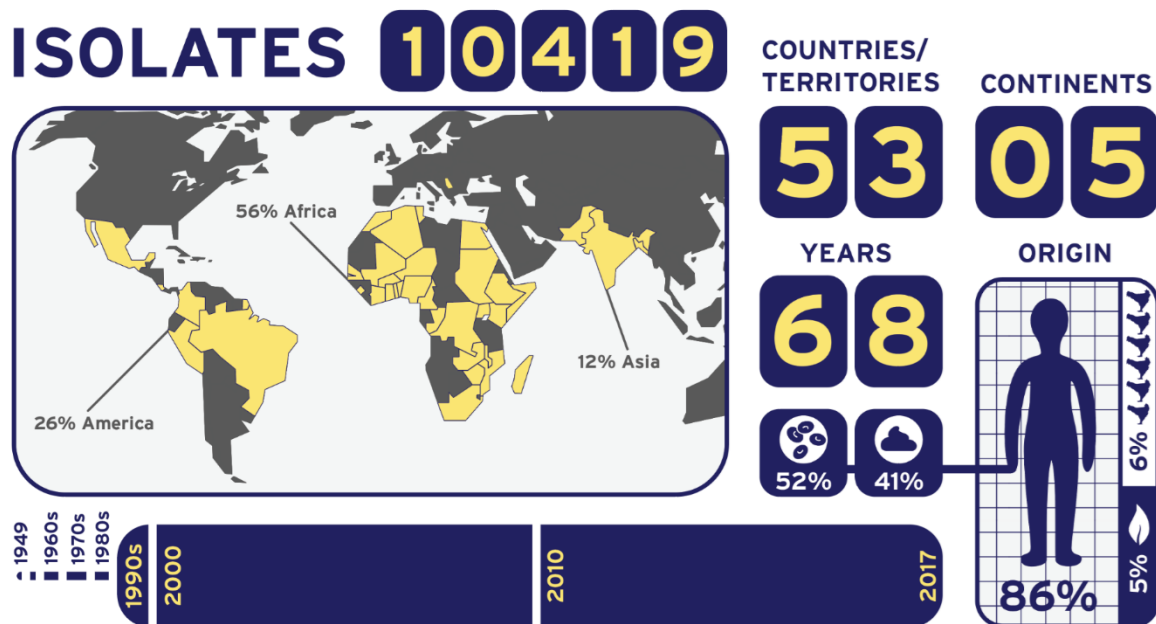

**Fig. 1** Summary of the geographical origin, timeline and body site source of 10,419 bacterial isolates.

The 10,419 isolates were collected from 53 countries/territories spanning 5 continents (America, Africa, Asia, Europe, & Oceania), with most isolates originating from Africa (56%) and America (26%). The samples were mostly of human origin (86%), of which 52% were blood isolates, 41% were stool isolates, and 7% from other body compartments. About 5% samples originated from environmental sources, 6% were of animal origin, and 3% unknown. The bacterial pathogens were isolated over a 68-year time period, from 1949 to 2017. The majority of samples were isolated after 1990.

100 Members of the 10KSG provided access to 10,419 bacterial isolates from collections that  
101 spanned 51 LMI countries and regions (such as Reunion Island, an overseas department and

102 region of the French Republic). We optimised the logistics of specimen collection and the  
103 transport of materials to the sequencing centre in the UK. The standardised protocols for  
104 metadata and sample submission were coordinated in three different languages (English,  
105 French and Spanish), which facilitated collaboration across several countries (Fig. 1).

106 A crucial criterion for inclusion of *Salmonella* isolates in this study was the availability of  
107 detailed metadata and phenotypic information, to maximise the insights that could be  
108 generated from bacterial genomics. We created a standardised metadata table for input of  
109 relevant parameters. The metadata template was divided into categories, including unique  
110 sample identifier, date of isolation, geographical location, source niche (human, animal or  
111 environmental isolate) & type (body compartment). We also collected data regarding the  
112 antimicrobial susceptibility of isolates, and captured additional information related to individual  
113 studies. We created a unified metadata master-form (Supplementary Table 1) by manual  
114 concatenation and curation of individual metadata forms.

### 115 ***Development of thermolysates and sample collection***

116 The main challenges for the global collection of bacterial samples are temperature-control and  
117 biological safety during transport. As refrigerated logistic chains are expensive, shipments  
118 should be at ambient temperature to minimise costs. To ensure biosafety, it was important to  
119 avoid the accidental transport of hazard group three (HG3) isolates (e.g., *S. Typhi* and *S.*  
120 *Paratyphi A*)<sup>24</sup>. Accordingly, we optimised a protocol for production of “thermolysates” that  
121 inactivated bacterial cells and permitted ambient temperature transport and adherence to  
122 containment level two (CL2) laboratory regulations, coupled with effective genomic DNA  
123 extraction for WGS (Supplementary Table 2). Inactivation of *Salmonella* can be achieved at  
124 temperatures between 55°C to 70°C for as little as 15 s at high temperature ( $\geq 95^\circ\text{C}$ )<sup>25</sup>. We  
125 optimised the method for generation of “thermolysates” by inactivating bacterial cultures at  
126 high temperature (95°C for 20 min). The optimisation involved testing under three different  
127 temperatures (90°C, 95°C or 100°C) and different incubation times (10 and 20 min). We also

128 tested the effective inactivation of other non-*Salmonella* Gram-positive (*Staphylococcus*  
129 *aureus*) and Gram-negative (*Escherichia coli*) organisms (Supplementary Table 2).

130 Temperature is a key factor in the transportation of samples, especially in some LMI countries  
131 where dry ice is expensive and difficult to source, and access to international courier  
132 companies is limited or very costly. To allow transport without refrigeration, we tested the  
133 stability of the resulting thermolysates at room temperature for more than seven days by  
134 controlling the quality of extracted DNA (Supplementary Table 2). Minimising the steps  
135 required for sample collection allowed us to reach collaborators with limited access to facilities  
136 and personnel.

137 We collected samples using screwed-cap barcoded tubes (FluidX tri-coded jacket 0.7 mL,  
138 Brooks Life Sciences, 68-0702-11) costing USD\$0.23 each, which we distributed from the UK  
139 to collaborators worldwide. Individually barcoded tubes were organised in FluidX plates in a  
140 96-well format, each with their own barcode. Both QR codes and human-readable barcodes  
141 were included on each tube to ensure that the correct samples were always sequenced, and  
142 to permit the replacement of individual tubes when required.

143 All isolates were obtained in compliance with the Nagoya protocol<sup>26</sup>. The combination of  
144 method optimisation, development and distribution of easy-to-follow protocols in English and  
145 Spanish (French was used only for communication), generating thermolysates and using  
146 barcoded tubes, the process of collecting the bacterial isolates was completed within one year.  
147 Barcoded tubes were distributed to collaborators, including an extra ~20% to permit  
148 replacements as required. In total, 11,823 tubes were used in the study, of which 10,419 were  
149 returned to the sequencing centre containing bacterial thermolysates for DNA extraction and  
150 genome sequencing. A comprehensive list of isolates is available in Supplementary Table 3.

151 To validate this approach for bacteria other than *Salmonella*, ~25% (2,573, 24.7%) of the  
152 samples were isolates from a variety of genera, including Gram-negatives such as *Shigella*  
153 and *Klebsiella*, and Gram-positives such as *Staphylococcus*.

#### 154 ***DNA extraction, library construction, quality control and genome sequencing***

155 Our high-throughput DNA extraction and library construction pipeline was designed to be  
156 versatile, scalable and robust, capable of processing thousands of samples in a time and cost-  
157 efficient manner. The procedure included DNA extraction, quality control (QC), normalisation,  
158 sequencing library construction, pooling, size selection and sequencing. The time taken for  
159 each step, and the associated consumable cost, is shown in Table 1. All the parts of the  
160 pipeline are scalable and can be run simultaneously with robots, allowing hundreds of samples  
161 to be processed each day, in a 96-well format. With dedicated pre- and post-PCR robots, up  
162 to 768 bacterial samples were processed each day. The total consumable cost for extraction  
163 of DNA and genome sequence generation was less than USD\$10 per sample (excluding staff  
164 time). Given the high-throughput nature of this project, and the difficulty in optimising the  
165 processes to account for every possible variation in DNA/library quality and quantity, this cost  
166 includes a 20% contingency.

**Table 1.** Processing time and consumable costs for DNA extraction and sequencing.

| <b>Activity</b>                                      | <b>Processing time (h)<sup>a</sup></b> | <b>Hands-on time (h)<sup>a</sup></b> | <b>Consumable (USD\$)<sup>a,b</sup></b> | <b>cost</b> |
|------------------------------------------------------|----------------------------------------|--------------------------------------|-----------------------------------------|-------------|
| DNA extraction                                       | 1                                      | 0.5                                  | 93.88                                   |             |
| DNA QC and normalisation                             | 1                                      | 0.5                                  | 136.44                                  |             |
| Library Construction, QC, pooling and size selection | 6                                      | 1                                    | 277.86                                  |             |
| Sequencing <sup>c</sup>                              | 85                                     | 1                                    | 459.35                                  |             |
| <b>Total</b>                                         | <b>93 h</b>                            | <b>3 h</b>                           | <b>USD\$ 967.53</b>                     |             |

<sup>a</sup> Per 96 well plate

<sup>b</sup> Converted from GBP (1 GBP = 1.25 USD)

<sup>c</sup> Based on Illumina HiSeq4000 runs



167 In designing the DNA extraction pipeline, we anticipated that samples would contain a wide  
168 range of DNA concentrations due to the different approaches by collaborators, some of whom  
169 sent thermolysates and others extracted DNA. The DNA was isolated in a volume of 20  $\mu$ L,  
170 and the total yield ranged from 0 to 2,170 ng (average of 272 ng). Less than 6% samples  
171 contained less than 2.5 ng (Supplementary Fig. S1).

172 To facilitate large-scale low-cost whole-genome sequencing, we developed the LITE (Low  
173 Input, Transposase Enabled; Fig. 2) pipeline, a low-cost high-throughput library construction  
174 protocol based on the Nextera kits (Illumina). Prior to LITE library construction, all DNA  
175 samples were normalised to 0.25 ng/ $\mu$ L unless the concentration was below that limit, in which  
176 case samples remained undiluted. We calculated that given a bacterial genome size of  
177 4.5 Mbp, 1 ng of DNA equated to over 200,000 bacterial genome copies. Hence the LITE  
178 pipeline was optimised to work with inputs ranging from 0.25 to 2 ng DNA. As the ratio of DNA  
179 to transposase enzyme determines the insert size of the libraries being constructed, this input  
180 amount allowed us to minimise reagent use and reaction volumes. The LITE pipeline permitted  
181 the construction of over 1,000 Illumina-compatible libraries from the 24-reaction Illumina kits,  
182 Tagment DNA Enzyme (Illumina FC 15027865) and Illumina Tagment DNA Buffer (Illumina  
183 FC 15027866).

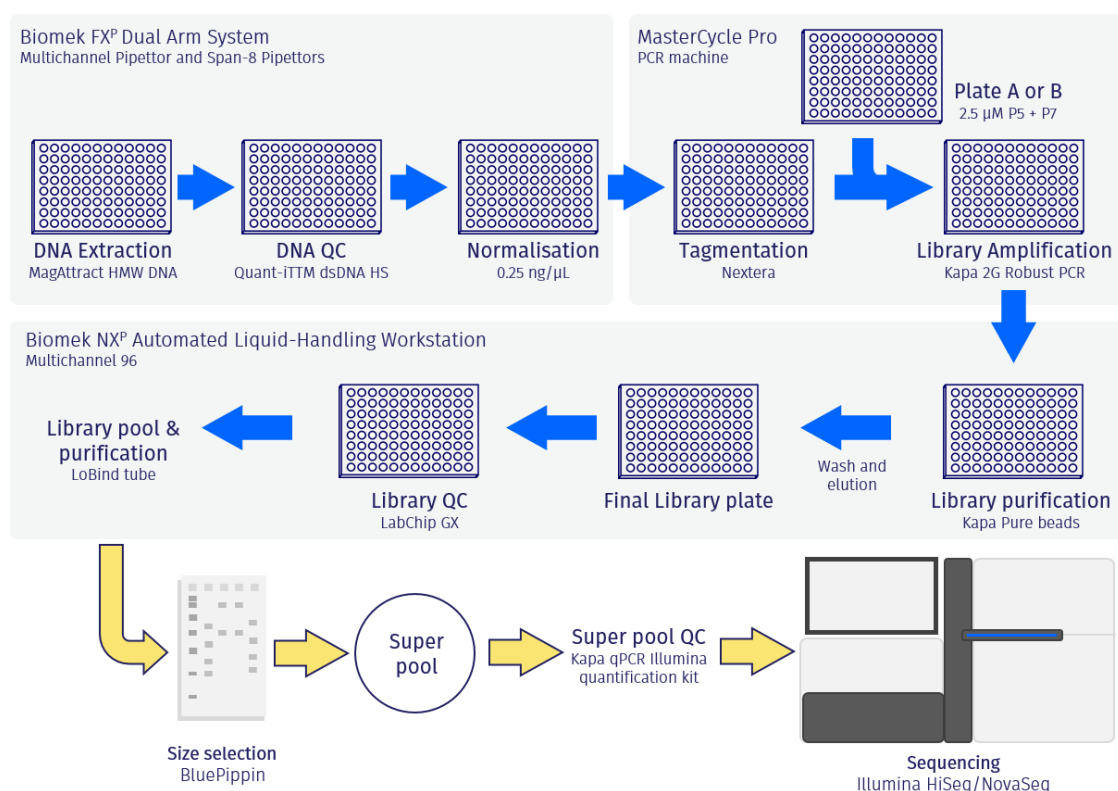

**Fig. 2** LITE (Low Input, Transposase Enabled) pipeline for library construction.

The DNA was extracted using a protocol based on the MagAttract HMW DNA isolation kit (Qiagen). Library construction was performed by tagmentation using Nextera tagmentation kit, size selected on a BluePippin, and quantified using a High Sensitivity BioAnalyzer kit (Agilent) and Qubit dsDNA HS Assay (ThermoFisher). Genome sequencing of “super pools” was performed in a HiSeq™ 4000 (Illumina) system, and re-sequencing in NovaSeq™ 6000 (Illumina) when needed, both with a 2 x 150 bp paired ends read metric.

184 To maximise the multiplexing capability for the LITE pipeline, we designed 438 bespoke 9-bp  
 185 barcodes (Supplementary Table 4), each with a hamming distance of 4 bp, giving the option  
 186 to pool over 190,000 samples or uniquely dual-index more than 200 samples. The 438  
 187 barcodes allowed multiplexing capability to be maximised, and a further reduction in costs as  
 188 sequencer throughputs increase in the future.

189 For this study we used 9-bp barcoded P7 PCR primers (Illumina) and employed twelve 6-bp  
 190 barcoded P5 PCR primers (Illumina) when multiplexing 12 x 96-well plates on a HiSeq 4000

191 system (Illumina) and targeted a median 30x genome coverage. By using an input of only  
192 0.5 ng DNA, combined with 14 PCR cycles consistently provided detectable amounts of library  
193 across the majority of samples.

194 Quality control (QC) of the resulting LITE libraries involved a Perkin Elmer LabChip® GX  
195 Nucleic Acid Analyzer. The LITE libraries typically gave three different GX electropherogram  
196 profiles depending upon whether the DNA was high molecular weight, partially degraded or  
197 completely degraded (Supplementary Fig. S2). A wide range of electropherogram profiles and  
198 the resultant molarity of library molecules was expected at this point, due to the varied  
199 approaches used by collaborators to produce and transport samples.

200 Up to 12 of the 96 pooled and size-selected libraries were then combined and run on a single  
201 HiSeq 4000 system lane, with a 2 x 150 bp paired-end read metric. After the initial screen was  
202 completed, samples that failed to produce 30x genome coverage were re-sequenced on a  
203 NovaSeq 6000 system, also with a 2 x 150 bp read metric. In total 1,525 (15.2%) of the 9,976  
204 samples processed required re-sequenced, a proportion that was within the 20% contingency  
205 added to our unit cost.

## 206 ***Bioinformatic analysis and data provision***

207 To complete our WGS approach, we developed and implemented a bespoke sequence  
208 analysis bioinformatic pipeline for the *Salmonella* samples included in the study. The full  
209 pipeline is available from [https://github.com/apredeus/10k\\_genomes](https://github.com/apredeus/10k_genomes). Because the estimation  
210 of sequence identity and assembly quality is relatively species-independent, and annotation  
211 is strongly species-specific, the pipeline can be easily adapted to other bacterial species by  
212 changing quality control criteria and specifying relevant databases of known proteins.

213 Following DNA extraction, sequencing and re-sequencing, we generated sequence reads for  
214 9,976 (96.0%) samples, of which 7,236 were bioinformatically classified as *Salmonella*  
215 *enterica* using Kraken2 and Bracken<sup>27,28</sup>. A small proportion of the samples (209 out of 9,976;

216 2.1%) had been wrongly identified as *Salmonella* prior to sequencing. The remaining samples  
217 corresponded to 1,157 Gram-positive and Gram-negative bacterial isolates that were included  
218 to validate the study. The 443 (4.3%, out of the 10,419 samples received) samples that did  
219 not generate sequence reads reflected poor quality DNA extraction, due to either low biomass  
220 input or partial cell lysis. Overall, the generation of sequence data from the vast majority of  
221 samples demonstrated the robustness of the use of thermolysates coupled with the high-  
222 throughput LITE pipeline for processing thousands of samples from a variety of different  
223 collaborating organisations.

224 To assess the quality of sequence data, we focused on the 7,236 (69.5%) genomes identified  
225 as *Salmonella enterica* (Fig. 3). To allow the bioinformatic analysis to be customisable for  
226 other datasets, we developed a robust quality control (QC) pipeline to do simple uniform  
227 processing of all samples, and to yield the maximum amount of reliable genomic information.  
228 Well-established software tools were used to assess species-level identity from raw reads,  
229 trim the reads, assess coverage and duplication rate, assemble genomes, and to make  
230 preliminary evaluation of antibiotic resistance and virulence potential.

231 Trimming abundant adapters from the reads produced by the LITE pipeline was critical for  
232 optimal genome assembly. Using Quast<sup>29</sup> and simple assembly metrics, we evaluated the  
233 performance of Trimmomatic<sup>30</sup> in palindrome mode with and without retention of singleton  
234 reads, compared with BBDuk (<https://igi.doe.gov/data-and-tools/bbtools>) in paired-end mode.  
235 BBDuk was selected for our analysis because this tool generated genomes with a higher N50,  
236 and a comparable number of mis-assemblies.

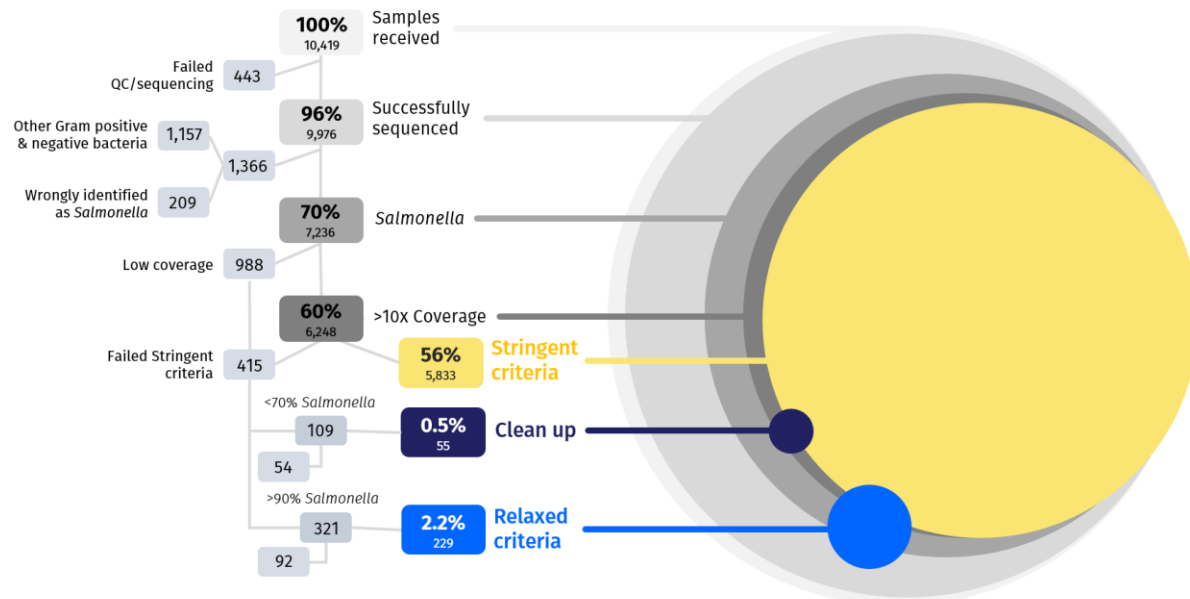

**Fig. 3** The sequential quality control process used to select whole-genome sequences for detailed analysis.

Of the 10,419 isolates, 443 failed the DNA extraction or quality control prior to genome sequencing. We produced sequencing libraries of 9,975 samples, of which 1,366 were not bioinformatically-identified as *Salmonella enterica*. These 1,366 corresponded to 1,157 which were part of the 25% non-*Salmonella* component of the project, plus 209 isolates that had been mis-identified as *Salmonella* before sequencing. Of the 7,236 *Salmonella* genomes, 6,248 had sequence coverage over 10x, of which 5,833 passed the “stringent criteria”. Of the 415 samples that failed the “stringent criteria”, 284 samples were rescued based on a “clean up” (55) or a “relaxed criteria” (229). Overall, we generated 6,117 high-quality *Salmonella* genomes.

237 Genome assembly was performed using SPAdes<sup>31</sup> via Unicycler<sup>32</sup> in short-read mode.  
 238 SPAdes is an established and widely-used tool for bacterial genome assembly, whilst  
 239 Unicycler optimises SPAdes parameters and performs assembly polishing by mapping reads  
 240 back to the assembled genomes. Genome assembly QC was done using the criteria  
 241 established by the genome database EnteroBase<sup>33</sup>. Specifically, these “stringent criteria”  
 242 required: 1) total assembly length between 4 and 5.8 Mb, 2) N50 of 20 kb or more, 3) fewer  
 243 than 600 contigs, and 4) more than 70% sequence reads assigned to the correct species.

244 Using this approach for *S. enterica*, 5,833 of the *Salmonella* genomes (80.6%) passed QC  
245 (Fig. 3).

246 To “rescue” all possible *S. enterica* in the remaining assemblies with coverage greater than  
247 10x that failed the stringent QC, two approaches were used: “relaxed criteria” and “clean up”.  
248 The “relaxed criteria” accepted assemblies of 4 Mb to 5.8 Mb overall length, species-purity of  
249 90% or more, N50 > 10kb, and fewer than 2,000 contigs. In contrast, the “clean up” approach  
250 was used for assemblies that had < 70% *Salmonella* sequence reads using the “stringent  
251 criteria”. The raw reads of these samples were “cleaned” using Kraken2 & Bracken, with the  
252 reads assigned to *Salmonella* being retained, and subjected to the “stringent criteria” for QC  
253 detailed above. The assemblies rescued by these two approaches accounted for a further  
254 3.9% (284) assemblies from our initial *Salmonella* collection. In total, we generated 6,117 high  
255 quality *S. enterica* genomes, corresponding to 84.5% of the total *Salmonella* isolates  
256 successfully sequenced through the LITE pipeline (Fig. 3 and 4).

257 Genome sequence data were shared with collaborators via downloadable packages hosted  
258 by the Centre of Genomic Research, University of Liverpool (UK). These packages included  
259 sequencing statistics, raw (untrimmed) fastq files of sequence reads, and the individual  
260 genome assemblies. We included the genome-derived *Salmonella* serovar and sequence type  
261 of each isolate (Fig. 4).

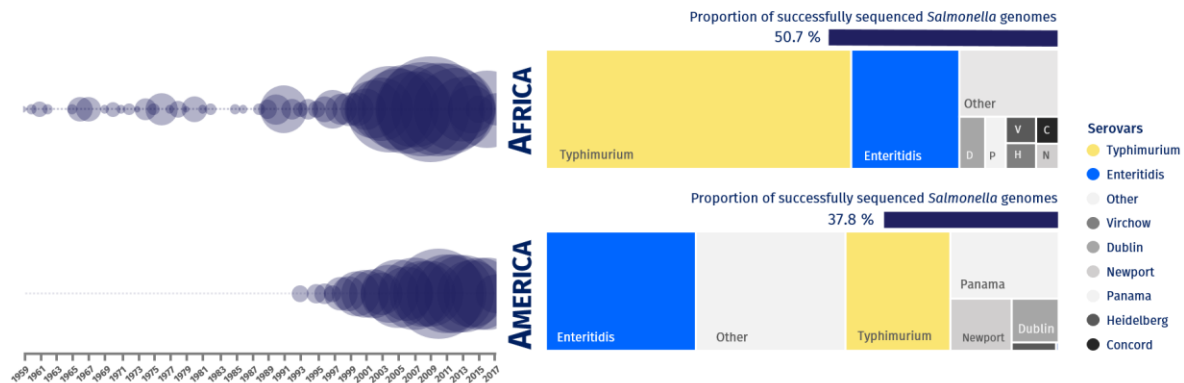

**Fig. 4** Genome-based summary of *Salmonella enterica* from African and American datasets, organised by continent, year of isolation, and serovar.

Of the 6,117 *Salmonella enterica* genomes that were successfully sequenced and that passed QC, 3,100 (50.7%) were from Africa and 2,313 (37.8%) were from America. Bubble size represents the number of genomes isolated between 1959 and 2017. The graphs represent the proportion of the main *Salmonella* serovars predicted based on genome analysis: 1,844 *S. Typhimurium* & 657 *S. Enteritidis* from Africa, and 474 *S. Typhimurium* & 676 *S. Enteritidis* from America.

262 Together with predicted sequence type and serovar, the genome-derived information was  
263 provided to permit local surveillance laboratories and infectious disease clinicians to derive  
264 important insights about the *Salmonella* variants circulating in their countries. The value of  
265 bacterial WGS data for generating epidemiological insights or understanding pathogen  
266 evolution has been summarised recently<sup>19</sup>. All the processed sequence reads and assemblies  
267 were deposited in the European Nucleotide Archive under the project accession number  
268 PRJEB35182 (ERP118197). Individual accession numbers are listed in Supplementary  
269 Table 3.

## 270 Discussion

271 We have optimised an efficient and relatively inexpensive method for large-scale collection  
272 and sequencing of bacterial genomes, by streamlining the collection of isolates, and

273 developing a logistics pipeline that permitted ambient shipment of thermolysates. The global  
274 focus of our study provided a diverse collection of 10,419 clinical and environmental bacterial  
275 isolates for a single sequencing study within one year.

276 The effectiveness and accessibility of our approach allowed all samples to be collected in a  
277 timely manner, and generated genomic data for LMI countries that lacked easy access to  
278 sequencing technology. The novel optimised DNA extraction and sequencing LITE pipeline  
279 allowed bacterial genomes to be generated at a consumables cost of USD\$10 per sample  
280 (the full economic cost cannot be calculated because collaborator staff time was an in-kind  
281 contribution). This optimised DNA extraction and sequencing pipeline, in conjunction with the  
282 generation of thermolysates, provides a robust approach for global collaboration on the  
283 genome-based mass surveillance of pathogens.

284 However, our approach did pose manual and logistical challenges. We propose that for future  
285 implementations of a similar approach for sequencing thousands of bacterial isolates, it is  
286 important to make an early investment in the development of a shared, protected and version  
287 controlled database to store epidemiological information, coupled with automated scripts to  
288 handle sequencing data, and a streamlined system for the sending and receiving of samples.

289 Our method is suitable for other large collections of Gram-negative or Gram-positive bacteria,  
290 and is designed to complete an academic genome sequencing project within a limited time-  
291 frame (one year). However, the LITE pipeline represents a compromise in terms of data quality  
292 to maximise economic value. It is important that all QC steps and the rigorous bioinformatic  
293 approach that we specify are followed to produce a reliable dataset, which in this case  
294 generated 84.5% high-quality genomes of the 7,236 successfully-sequenced *Salmonella*  
295 isolates (Fig. 3 and 4).

296 A key aspect of our methodology was the involvement of researchers fluent in multiple  
297 languages, to maximise clear communication and ensure access to countries across the



298 world. The approach will be particularly relevant when rapid, low-cost, and collaborative  
299 genome sequencing of bacterial pathogens is required. Our concerted approach  
300 demonstrates the value of true global collaboration, offering potential for tackling international  
301 epidemics or pandemics in the future.

## 302 References

- 303 1. Loman, N. J. *et al.* High-throughput bacterial genome sequencing: an embarrassment  
304 of choice, a world of opportunity. *Nat. Rev. Microbiol.* **10**, 599–606 (2012).
- 305 2. Goodwin, S., McPherson, J. D. & McCombie, W. R. Coming of age: ten years of next-  
306 generation sequencing technologies. *Nat. Rev. Genet.* **17**, 333–351 (2016).
- 307 3. Power, R. A., Parkhill, J. & De Oliveira, T. Microbial genome-wide association studies:  
308 lessons from human GWAS. *Nature Reviews Genetics* **18**, 41–50 (2016).
- 309 4. Bentley, S. D. & Parkhill, J. Genomic perspectives on the evolution and spread of  
310 bacterial pathogens. *Proc. R. Soc. B Biol. Sci.* **282**, 20150488 (2015).
- 311 5. Loman, N. J. *et al.* Performance comparison of benchtop high-throughput sequencing  
312 platforms. *Nat. Biotechnol.* **30**, 434–439 (2012).
- 313 6. Wetterstrand, K. A. DNA Sequencing Costs: Data from the NHGRI Genome  
314 Sequencing Program (GSP). Available at: [https://www.genome.gov/about-](https://www.genome.gov/about-genomics/fact-sheets/DNA-Sequencing-Costs-Data)  
315 [genomics/fact-sheets/DNA-Sequencing-Costs-Data](https://www.genome.gov/about-genomics/fact-sheets/DNA-Sequencing-Costs-Data). (Accessed: 27th November 2019)
- 316 7. Quainoo, S. *et al.* Whole-genome sequencing of bacterial pathogens: The future of  
317 nosocomial outbreak analysis. *Clinical Microbiology Reviews* **30**, 1015–1063 (2017).
- 318 8. Chun, J. *et al.* Comparative genomics reveals mechanism for short-term and long-term  
319 clonal transitions in pandemic *Vibrio cholerae*. *Proc. Natl. Acad. Sci. U. S. A.* **106**,  
320 15442–15447 (2009).
- 321 9. Weill, F.X. *et al.* Genomic history of the seventh pandemic of cholera in Africa. *Science*  
322 *(80- )*. **358**, 785–789 (2017).
- 323 10. Schürch, A. C. *et al.* High-resolution typing by integration of genome sequencing data  
324 in a large tuberculosis cluster. *J. Clin. Microbiol.* **48**, 3403–3406 (2010).
- 325 11. Walker, T. M. *et al.* Whole-genome sequencing for prediction of *Mycobacterium*  
326 *tuberculosis* drug susceptibility and resistance: a retrospective cohort study. *Lancet*  
327 *Infect. Dis.* **15**, 1193–1202 (2015).
- 328 12. Allix-Béguet, C. *et al.* Prediction of susceptibility to first-line tuberculosis drugs by DNA  
329 sequencing. *N. Engl. J. Med.* **379**, 1403–1415 (2018).
- 330 13. Land, M. *et al.* Insights from 20 years of bacterial genome sequencing. *Funct. Integr.*  
331 *Genomics* **15**, 141–161 (2015).
- 332 14. Kwong, J. C., McCallum, N., Sintchenko, V. & Howden, B. P. Whole genome sequencing  
333 in clinical and public health microbiology. *Pathology* **47**, 199–210 (2015).
- 334 15. Gladstone, R. A. *et al.* International genomic definition of pneumococcal lineages, to  
335 contextualise disease, antibiotic resistance and vaccine impact. *EBioMedicine* **43**, 338–  
336 346 (2019).
- 337 16. Bardsley, M. *et al.* Persistent transmission of shigellosis in England is associated with  
338 a recently emerged multidrug-resistant strain of *shigella sonnei*. *J. Clin. Microbiol.* **58**,  
339 (2020).
- 340 17. Black, A., MacCannell, D. R., Sibley, T. R. & Bedford, T. Ten recommendations for  
341 supporting open pathogen genomic analysis in public health. *Nat. Med.* (2020).  
342 doi:10.1038/s41591-020-0935-z
- 343 18. Kirk, M. D. *et al.* World Health Organization Estimates of the Global and Regional  
344 Disease Burden of 22 Foodborne Bacterial, Protozoal, and Viral Diseases, 2010: A  
345 Data Synthesis. *PLoS Med.* **12**, 1–21 (2015).
- 346 19. Moustafa, A. M., Lal, A. & Planet, P. J. Comparative genomics in infectious disease.

- 347 *Curr. Opin. Microbiol.* **53**, 61–70 (2020).
- 348 20. Stanaway, J. D. *et al.* The global burden of non-typhoidal *Salmonella* invasive disease:  
349 a systematic analysis for the Global Burden of Disease Study 2017. *Lancet Infect. Dis.*  
350 **19**, 1312–1324 (2019).
- 351 21. Stanaway, J. D. *et al.* The global burden of typhoid and paratyphoid fevers: a systematic  
352 analysis for the Global Burden of Disease Study 2017. *Lancet Infect. Dis.* **19**, 369–381  
353 (2019).
- 354 22. Okoro, C. K. *et al.* High-resolution single nucleotide polymorphism analysis  
355 distinguishes recrudescence and reinfection in recurrent invasive nontyphoidal  
356 salmonella typhimurium disease. *Clin. Infect. Dis.* **54**, 955–963 (2012).
- 357 23. Feasey, N. A. *et al.* Distinct *Salmonella* Enteritidis lineages associated with enterocolitis  
358 in high-income settings and invasive disease in low-income settings. *Nat. Genet.* **48**,  
359 1211–7 (2016).
- 360 24. Andrews, J. R. & Ryan, E. T. Diagnostics for invasive *Salmonella* infections: Current  
361 challenges and future directions. *Vaccine* **33**, C8–C15 (2015).
- 362 25. Silva, F. V. M. & Gibbs, P. A. Thermal pasteurization requirements for the inactivation  
363 of Salmonella in foods. *Food Res. Int.* **45**, 695–699 (2012).
- 364 26. *Nagoya protocol on access to genetic resources and the fair and equitable sharing of*  
365 *benefits arising from their utilization to the convention on biological diversity.*  
366 (Convention on Biological Diversity United Nations, United Nations Environmental  
367 Programme; [www.cbd.int](http://www.cbd.int), 2011).
- 368 27. Wood, D. E., Lu, J. & Langmead, B. Improved metagenomic analysis with Kraken 2.  
369 *Genome Biol.* **20**, 1–13 (2019).
- 370 28. Lu, J., Breitwieser, F. P., Thielen, P. & Salzberg, S. L. Bracken: Estimating species  
371 abundance in metagenomics data. *PeerJ Comput. Sci.* **2017**, 1–17 (2017).
- 372 29. Gurevich, A., Saveliev, V., Vyahhi, N. & Tesler, G. QUAST: quality assessment tool for  
373 genome assemblies. *Bioinformatics* **29**, 1072–1075 (2013).
- 374 30. Bolger, A. M., Lohse, M. & Usadel, B. Trimmomatic: a flexible trimmer for Illumina  
375 sequence data. *Bioinformatics* **30**, 2114–2120 (2014).
- 376 31. Bankevich, A. *et al.* SPAdes: A New Genome Assembly Algorithm and Its Applications  
377 to Single-Cell Sequencing. *J. Comput. Biol.* **19**, 455–477 (2012).
- 378 32. Wick, R. R., Judd, L. M., Gorrie, C. L. & Holt, K. E. Unicycler: Resolving bacterial  
379 genome assemblies from short and long sequencing reads. *PLoS Comput. Biol.* **13**,  
380 e1005595 (2017).
- 381 33. Alikhan, N.-F., Zhou, Z., Sergeant, M. J. & Achtman, M. A genomic overview of the  
382 population structure of Salmonella. *PLoS Genet.* **14**, e1007261 (2018).

383

## 384 **Acknowledgements**

385 The project was supported by both a Global Challenges Research Fund (GCRF) data &  
386 resources grant BBS/OS/GC/000009D and the BBSRC Core Capability Grant to the Earlham  
387 Institute BB/CCG1720/1. Next-generation sequencing and library construction were delivered  
388 via the BBSRC National Capability in Genomics and Single Cell (BB/CCG1720/1) at Earlham  
389 Institute, by members of the Genomics Pipelines Group. Each of the following Earlham  
390 Institute staff and alumni made an enormous contribution to the project: Dr Helen Chapman,  
391 Mr. Jake Collins, and Miss Sophie Stephenson. This project was partly supported by the  
392 Wellcome Trust Senior Investigator Award (106914/Z/15/Z) to Jay C. D. Hinton. We are  
393 grateful to the Centre for Genomic Research, University of Liverpool (UK) for computing  
394 support.

## 395 **Author contributions**

396 NH and JCDH conceived the idea and received funding. BPS wrote the manuscript. JCDH,  
397 NH, CVP, AVP, DH, BK, KSB, WR and NAF contributed to manuscript writing and editing. The  
398 10KSG consortium reviewed the manuscript. JCDH, NH, NAF, KSB, CVP and BPS designed  
399 the study. BPS and KC curated the metadata. BPS was the main point of contact for the  
400 10KSG consortium, designed and prepared protocols & other material for collaborators, and  
401 distributed barcoded tubes. WR and BPS designed web page. RL uploaded generated data  
402 to ENA. CW and NS supervised logistics at the Earlham Institute. BPS, CVP and HW  
403 optimised thermolysates generation. AVP, CVP, RL and CS developed bioinformatic pipelines  
404 and analysis. DH and JL optimised LITE protocol. BPS, CVP and the 10KSG consortium  
405 isolated and prepared bacterial samples.

## 406 **Competing interests**

407 The authors declare no competing interests.

## **The 10,000 *Salmonella* genomes (10KSG) Consortium (in alphabetical order)**

Blanca M. Perez-Sepulveda<sup>1</sup>, Darren Heavens<sup>2</sup>, Caisey V. Pulford<sup>1</sup> & María Teresa Acuña<sup>11</sup>, Dragan Antic<sup>1</sup>, Martin Antonio<sup>5</sup>, Kate S. Baker<sup>1</sup>, Johan Bernal<sup>8</sup>, Hilda Bolaños<sup>11</sup>, Marie Chattaway<sup>9</sup>, Angeziwa Chirambo<sup>4</sup>, Karl Costigan<sup>1</sup>, Saffiatou Darboe<sup>5</sup>, Paula Díaz<sup>10</sup>, Pilar Donado<sup>8</sup>, Carolina Duarte<sup>10</sup>, Francisco Duarte<sup>11</sup>, Dean Everett<sup>4</sup>, Séamus Fanning<sup>12</sup>, Nicholas A. Feasey<sup>3,4</sup>, Patrick Feglo<sup>13</sup>, Adriano M. Ferreira<sup>15</sup>, Rachel Floyd<sup>1</sup>, Ronnie G Gavilán<sup>13,26</sup>, Melita A. Gordon<sup>1,4</sup>, Neil Hall<sup>2</sup>, Rodrigo T. Hernandez<sup>15</sup>, Gabriela Hernández-Mora<sup>16</sup>, Jay C. D. Hinton<sup>1</sup>, Daniel Hurley<sup>12</sup>, Irene N. Kasumba<sup>17</sup>, Benjamin Kumwenda<sup>7</sup>, Brenda Kwambana-Adams<sup>24</sup>, James Lipscombe<sup>2</sup>, Ross Low<sup>2</sup>, Salim Mattar<sup>18</sup>, Lucy Angeline Montaña<sup>10</sup>, Cristiano Gallina Moreira<sup>15</sup>, Jaime Moreno<sup>10</sup>, Dechamma Mundanda Muthappa<sup>12</sup>, Satheesh Nair<sup>9</sup>, Chris M. Parry<sup>3</sup>, Chikondi Peno<sup>4</sup>, Jasnehta Permala-Booth<sup>17</sup>, Jelena Petrović<sup>19</sup>, Alexander V. Predeus<sup>1</sup>, José Luis Puente<sup>20</sup>, Getenet Rebrie<sup>21</sup>, Martha Redway<sup>1</sup>, Will Rowe<sup>1,6</sup>, Terue Sadatsune<sup>15</sup>, Christian Schudoma<sup>2</sup>, Neil Shearer<sup>2</sup>, Claudia Silva<sup>20</sup>, Anthony M. Smith<sup>22,25</sup>, Sharon Tennant<sup>17</sup>, Alicia Tran-Dien<sup>23</sup>, Chris Watkins<sup>2</sup>, Hermione Webster<sup>1</sup>, François-Xavier Weill<sup>23</sup>, Magdalena Wiesner<sup>10</sup>, Catherine Wilson<sup>1,4</sup>

<sup>1</sup>IVES, University of Liverpool, Liverpool, UK

<sup>2</sup>Earlham Institute, Norwich Research Park, Norwich, UK

<sup>3</sup>Liverpool School of Tropical Medicine, Liverpool, UK

<sup>4</sup>Malawi-Liverpool-Wellcome Programme, Blantyre, Malawi

<sup>5</sup>Medical Research Council Unit The Gambia at LSHTM

<sup>6</sup>University of Birmingham, Birmingham, UK

<sup>7</sup>College of Medicine, University of Malawi, Blantyre, Malawi

<sup>8</sup>Corporación Colombiana de investigación Agropecuaria AGROSAVIA, Colombia

<sup>9</sup>Public Health England, UK

<sup>10</sup>Instituto Nacional de Salud (INS), Colombia

<sup>11</sup>Instituto Costarricense de Investigación y Enseñanza en Nutrición y Salud (INCIENSA), Costa Rica

<sup>12</sup>University College Dublin, Ireland

<sup>13</sup>Kwame Nkrumah University of Science and Technology, Ghana

<sup>14</sup>Instituto Nacional de Salud, Lima, Peru

<sup>15</sup>São Paulo State University (UNESP), Brazil

<sup>16</sup>Bacteriology Laboratory, Servicio Nacional de Salud Animal (SENASA), Costa Rica

<sup>17</sup>University of Maryland School of Medicine, USA

<sup>18</sup>Instituto de Investigaciones Biológicas del Trópico, Universidad de Córdoba, Colombia

<sup>19</sup>Scientific Veterinary Institute Novi Sad, Serbia

<sup>20</sup>Instituto de Biotecnología, UNAM, Mexico

<sup>21</sup>University of Jimma, Ethiopia

<sup>22</sup>National Institute for Communicable Diseases (NICD), South Africa

<sup>23</sup>Institut Pasteur, Paris, France

<sup>24</sup>University College London, London, UK

<sup>25</sup>University of the Witwatersrand, South Africa

<sup>26</sup>Escuela Profesional de Medicina Humana, Universidad Privada San Juan Bautista, Lima,  
Peru

## Supplementary material

**Supplementary Table 1.** Metadata template form

**Supplementary Table 2.** Optimisation of bacterial thermolysates generation and DNA extraction.

**Supplementary Table 3.** Metadata for sequenced isolates, including bioinformatic stats for *Salmonella* genomes and ENA accession numbers.

**Supplementary Table 4.** Bespoke 9 bp barcodes for library construction using the LITE pipeline

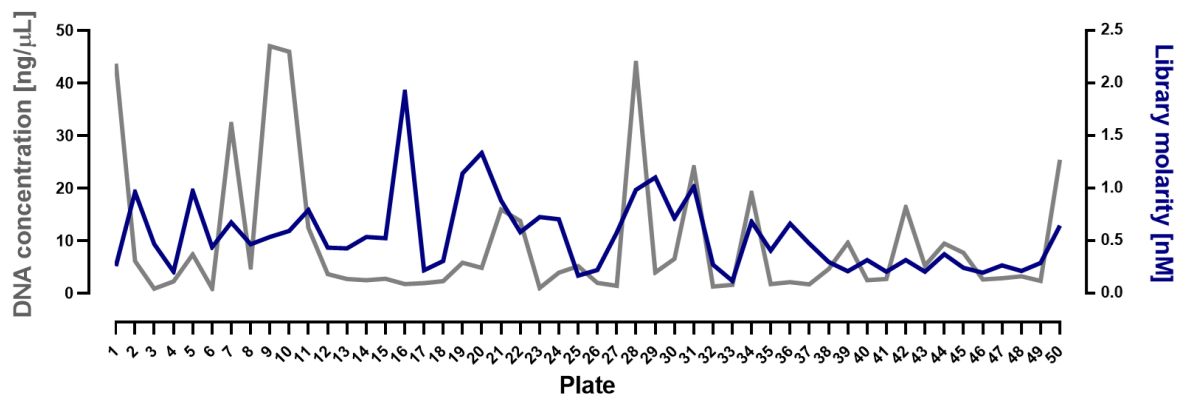

**Supplementary figure S1:** Average DNA concentration and molarity of libraries constructed using the LITE pipeline across individual 96-well plates.

Average DNA concentrations (grey) and library molarity between 400 and 600 bp (blue) are shown for the first fifty 96-well plates that were processed.

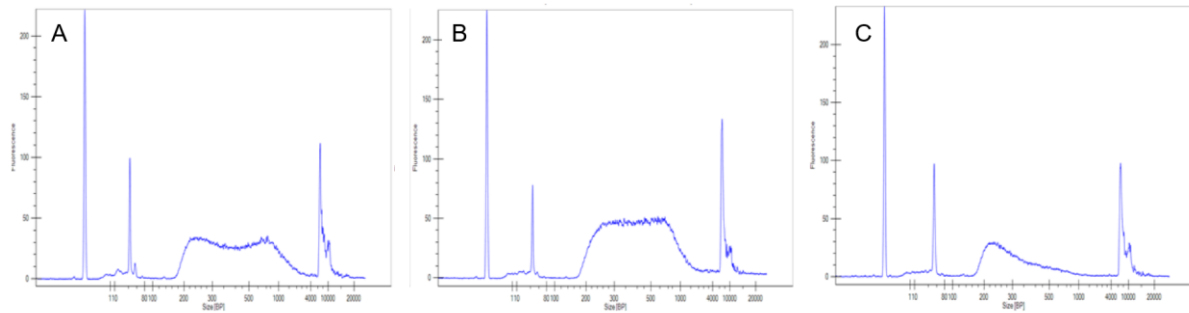

**Supplementary figure S2:** Assessment of DNA integrity amongst libraries constructed using the LITE pipeline.

Perkin Elmer GX electropherograms of exemplar LITE libraries: (A) high quality HMW DNA, (B) partially-degraded DNA, and (C) degraded DNA.



## 408 **Methods**

### 409 ***Study design and optimisation***

410 We designed the project with the aim of validating an efficient method for large-scale assembly  
411 and sequencing of bacterial genomes. We selected *Salmonella* as a model organism due to  
412 its worldwide relevance and current burden of infection. We aimed to assemble a pool of  
413 bacterial samples that would represent the different scenarios, including a 25% of non-  
414 *Salmonella* isolates, to allow the method to be extrapolated to other bacterial datasets. The  
415 25% of non-*Salmonella* organisms were selected to cover Gram-negative (*Shigella* and  
416 *Klebsiella*) and Gram-positive (*Staphylococcus*) bacteria. The targeted *Salmonella* isolates  
417 were predominantly *S. Enteritidis* and Typhimurium, and associated with human bloodstream  
418 infection. However we expanded the sampling criteria to other serovars, body compartments  
419 and source types to include some animal and environmental samples.

420 Method optimisation focused on standardising a safe protocol for sample transport and  
421 processing. Briefly, the optimised method comprised bacterial isolates grown at 37°C  
422 overnight directly in FluidX tubes (FluidX tri-coded jacket 0.7 mL, 68-0702-11, Brooks Life  
423 Sciences) with 100 µL rich media (LB or Buffered Peptone) from a frozen stock (one “scoop”  
424 or bead (Microbank™, Pro Lab Diagnostics Inc.). Then, the samples were inactivated by  
425 incubation at > 95°C for 20 min, followed by storage at 4°C until collection. Sample  
426 transportation was carried out at ambient temperature.

427 We optimised this method using *Salmonella enterica* serovar Typhimurium D23580,  
428 *Escherichia coli* K12, and *Staphylococcus aureus* Newman, selecting either a “scoop” with a  
429 10 µL plastic loop taken from a bacterial glycerol (50% v/v) stock or 2 beads of bacteria stored  
430 at -80°C in a Microbank tube™ cryotubes (Pro-Lab Diagnostics). The samples were grown at  
431 37°C and 220 rpm overnight in either 100 or 200 µL LB (1% tryptone, 0.5% yeast extract, 0.5%  
432 NaCl; pH 7.0). 100 µL of each sample was heated to either 90°C, 95°C or 100°C for 10 min

433 or 20 min, and then plated on nutrient agar (1.5% Agar-LB) for CFU determination  
434 (Supplementary Table 2).

435 To test the effect of transport, the samples were subjected to genomic DNA extraction using  
436 a DNeasy Blood & Tissue Kit (Qiagen) after incubation at room temperature for more than 7  
437 days. The quality of extracted DNA was assessed by 1% agarose gel electrophoresis, and  
438 fluorometric DNA quantification using Qubit™ dsDNA HS Assay Kit (Invitrogen™)  
439 (Supplementary Table 2).

440 Detailed protocols were sent to collaborators, along with a metadata template and barcoded  
441 tubes. The design of the metadata template and protocol booklet was tested several times for  
442 clarity and to obtain unified information avoiding different interpretations by the user. The  
443 metadata template (Supplementary Table 1) was a Microsoft Excel spreadsheet divided in five  
444 main categories: 1) Unique identifiers, with information about pre-read barcodes, including  
445 plate & tube barcode, tube location, and replacement barcode, 2) Isolate details,  
446 encompassing information about strain name, bacterial species & serovar (*Salmonella* only),  
447 sender, date and location of isolation, and type of sample submitted (DNA, thermolysates or  
448 preserved culture), 3) Sample type, with detailed information about source of isolation, such  
449 as human, animal or environmental origin, and 4) Antimicrobial resistance phenotype of tested  
450 antimicrobials. We also added an extra column for relevant information that could not be  
451 assigned to any other category, such as type of study and references. The metadata collected  
452 were stored per collaborator and then combined into a metadata master form for curation.  
453 Curation was done manually, standardising each category by column and keeping version  
454 control. The final metadata master form was cross-referenced with the list of sent barcodes  
455 for inconsistencies.

456 ***DNA extraction and normalisation***

457 DNA was extracted from bacterial thermolysates on a Biomek FX<sup>P</sup> instrument using a protocol  
458 based on the MagAttract HMW DNA isolation kit (Qiagen). Incomplete barcoded 96-tube  
459 plates received were re-organised and FluidX barcodes re-read using the FluidX barcode  
460 reader and software prior to DNA extraction, to determine plate layouts. The tubes were de-  
461 capped using a manual eight-tube decapper and the cellular material was re-suspended using  
462 a multichannel pipette. Up to 100 µL of the suspension were transferred to a clean 96-well  
463 plate. The plate was spun at 4,000 rpm in an Eppendorf 5810R centrifuge to pellet the cells  
464 and discard the supernatant.

465 Cell pellets were re-suspended in a mixture of 12 µL of Qiagen ATL buffer and 2 µL  
466 Proteinase K, and incubated at 56°C for 30 min in an Eppendorf Thermomixer C. The samples  
467 were cooled to room temperature, and 1 µL of MagAttract Suspension G was added. The  
468 samples were mixed, and 18.67 µL of Qiagen MB buffer were added, followed by mixing. The  
469 samples were incubated for 3 min and placed on a 96-well magnetic particle concentrator  
470 (MPC) to pellet the beads. The supernatant was discarded, and whilst remaining on the MPC  
471 the beads were washed once with 45 µL Qiagen MW1 buffer and once with 45 µL Qiagen PE  
472 buffer. The recommended water washes were omitted to help increase yield.

473 The plate was then removed from the MPC and, using a new set of filter tips, 20 µL of Qiagen  
474 AE buffer was added and the samples mixed to re-suspend the beads. The samples were  
475 incubated at room temperature for 3 min to elute the DNA. The plate was placed back on the  
476 MPC and the DNA was transferred to a new 96-well plate.

477 The concentration of each sample was determined using the Quant-iT™ dsDNA Assay, high  
478 sensitivity kit (ThermoFisher). A standard curve was generated by mixing 10 µL of the eight  
479 DNA standards provided (0 to 10 ng/µL) with 189 µL of 1x Quant-iT™ dsDNA HS buffer, 1 µL

480 of Quant-iT™ dsDNA HS reagent and 1 µL of DNA in a 96-well black Greiner plate. The  
481 fluorescence was detected on a Tecan Infinite F200 Pro plate reader (Tecan).

482 For samples received as DNA, 198 µL of 1x Quant-iT™ dsDNA HS buffer, 1 µL of Quant-  
483 iT™ dsDNA HS reagent and 1 µL of DNA were combined in a 96-well black Greiner plate,  
484 and the fluorescence detected using the Tecan plate reader. Concentrations were calculated  
485 using the standard curve, and the DNA was normalised to 0.25 ng/µL in elution buffer using  
486 the Biomek FX<sup>P</sup> instrument.

#### 487 ***Library construction and sequencing***

488 A master mix containing 0.9 µL of Nextera buffer, 0.1 µL Nextera enzyme and 2 µL of DNase  
489 free water was combined with 2 µL of normalised DNA. This reaction was incubated at 56°C  
490 for 10 min on an Eppendorf MasterCycle Pro PCR instrument. 2 µL of an appropriately  
491 barcoded 2.5 µM P7 adapter were added, and then 18 µL of a master mix containing 2 µL of  
492 an appropriately barcoded 2.5 µM P5, 5 µL Kapa Robust 2G 5x reaction buffer, 0.5 µL 10 mM  
493 dNTPs, 0.1 µL Kapa Robust 2G polymerase and 10.4 µL DNase free water were added to the  
494 tube. This reaction was then subjected to PCR amplification as follows: 72°C x 3 min, 98°C  
495 for 2 min, then 14 cycles of 98°C x 10 s, 62°C x 30 s and 72°C x 3 min, followed by a final  
496 incubation at 72°C for 5 min on an Eppendorf MasterCycle Pro.

497 The amplified library was then subjected to a magnetic bead-based purification step on a  
498 Biomek NX<sup>P</sup> instrument. 25 µL of Kapa Pure beads (Roche, UK) were added to 25 µL of  
499 amplified library, and mixed. This library was incubated at room temperature for 5 min, briefly  
500 spun in an Eppendorf 5810R centrifuge and placed on a 96-well magnetic particle  
501 concentrator. Once the beads had pelleted, the supernatant was removed and discarded, and  
502 the beads washed twice with 40 µL of freshly prepared 70% ethanol. After the second ethanol  
503 wash, the beads were left to air dry for 5 min. The 96-well plate was removed from the MPC  
504 and the beads were re-suspended in 25 µL of 10 mM TRIS-HCl, pH 8 (Elution Buffer). The

505 DNA was eluted by incubating the beads for 5 min at room temperature. The plate was  
506 replaced on the MPC, the beads allowed to pellet, and the supernatant containing the DNA  
507 was transferred to a new 96-well plate.

508 To assess the concentrations of individual libraries, 20  $\mu$ L of elution buffer was added to 2  $\mu$ L  
509 of purified library, and run on a LabChip GX (Perking Elmer) using the High throughput, High  
510 Sense reagent kit and HT DNA Extended Range Chip according to manufacturers'  
511 instructions. To determine the amount of material present in each library between 400 and  
512 600 bp, a smear analysis was performed using the GX analysis software. The resulting value  
513 was used to calculate the amount of each library to pool. Pooling of each 96-libraries was  
514 performed using a Biomek Nx instrument. 100  $\mu$ L of the pooled libraries were added to 100  $\mu$ L  
515 of Kapa Pure beads in a 1.5 mL LoBind tube. The sample was vortexed and incubated at room  
516 temperature for 5 min to precipitate the DNA onto the beads. The tube was then placed on an  
517 MPC to pellet the beads, the supernatant discarded, and the beads were washed twice with  
518 200  $\mu$ L of freshly prepared 70% ethanol. The beads were left to air dry for 5 min and then re-  
519 suspended in 30  $\mu$ L Elution Buffer. The samples were incubated at room temperature for 5 min  
520 to elute the DNA. The plate was placed back on the MPC and the DNA was transferred to a  
521 new 1.5 mL tube.

522 The concentrated sample containing a pool of 96 libraries was subjected to size selection on  
523 a BluePippin (Sage Science, Beverly, USA). The 40  $\mu$ L in each collection well of a 1.5%  
524 BluePippin cassette were replaced with fresh running buffer, and the separation and elution  
525 current checked prior to loading the sample. 10  $\mu$ L of R2 marker solution were added to 30  $\mu$ L  
526 of the pooled library, and then the combined mixture was loaded into the appropriate well.

527 Using the smear analysis feature of Perkin Elmer GX software, we calculated the amount of  
528 material between 400 and 600 bp for each library. We targeted this region based on the  
529 electropherograms in Supplementary Fig. S2, to minimise the overlap between 150 bp paired

530 end reads and maximise the number of libraries that would generate data. We determined the  
531 detection limit for the molarity within this size range to be 0.007 nM, meaning that libraries with  
532 lower concentrations were reported as 0.007 nM. The amount of library material between 400  
533 to 600 bp ranged from 0.0 to 2.4 nM (average of 0.3 nM), with less than 6% having less than  
534 0.007 nM (Supplementary Fig. S1).

535 Post size selection, the 40 µL from the collection well were recovered, and the library size was  
536 determined using a High Sensitivity BioAnalyzer kit (Agilent) and DNA concentration  
537 calculated using a Qubit dsDNA HS Assay (ThermoFisher). “Super pools” were created by  
538 equimolar pooling of up to 12 size-selected 96-sample pools, each with a different P5 barcode.  
539 Using these molarity figures, 96 libraries were equimolarly-pooled, concentrated and then  
540 size-selected using a 1.5% cassette on the Sage Science Blue Pippin.

541 To determine the number of viable library molecules, the super pools were quantified using  
542 the Kapa qPCR Illumina quantification kit (Kapa Biosystems) prior to sequencing. For the initial  
543 screen, sequencing was performed on the HiSeq™ 4000 (Illumina). For re-sequencing of  
544 samples, the sequencing was carried out in a lane of an S1 flowcell on the NovaSeq™ 6000  
545 (Illumina), both with a 2x150 bp read metric.

#### 546 ***Bioinformatic analysis and data distribution***

547 Raw sequencing reads (paired-end, 2x150 bp) were examined using FastQC v0.11.8  
548 (<https://www.bioinformatics.babraham.ac.uk/projects/fastqc>), confirming 0-20% Nextera  
549 adapter sequence presence in all examined reads. Quick coverage estimation was done raw  
550 unaligned reads, assuming genome length of 4.8 Mb for *Salmonella enterica*. Taxonomic  
551 classification of raw reads was performed using Kraken v2.0.8-beta<sup>1</sup> with Minikraken 8GB  
552 201904\_UPDATE database, followed by species-level abundance estimation using Bracken  
553 v1.0.0<sup>2</sup> with distribution for 150 bp k-mer. Sequence duplication level was estimated by  
554 alignment of reads using Bowtie v2.3.5<sup>3</sup> to genome assembly of LT2 strain (NCBI accession

555 number GCA\_000006945.2), followed by MarkDuplicates utility from Picard tools  
556 v2.21.1(<http://broadinstitute.github.io/picard>).

557 Raw sequence reads were then trimmed and assembled using Uncycler v0.4.7<sup>4</sup> in short-read  
558 mode. Several trimming strategies were tested including quality trimming with seqtk  
559 (<https://github.com/lh3/seqtk>) followed by Trimmomatic v0.39<sup>5</sup> in palindromic mode with and  
560 without retaining the single reads, and BBDuk v38.07 ([https://jgi.doe.gov/data-and-](https://jgi.doe.gov/data-and-tools/bbtools)  
561 [tools/bbtools](https://jgi.doe.gov/data-and-tools/bbtools)). We evaluated the resulting assemblies using overall length, N50, and number  
562 of contigs. Genome assembly quality was done using a the criteria established on  
563 EnteroBase<sup>6</sup> (<https://enterobase.readthedocs.io/en/latest>) for *S. enterica*: 1) total assembly  
564 length between 4 and 5.8 Mb; 2) N50 of 20 kb or more; 3) fewer than 600 contigs; 4) more  
565 than 70% correct species assigned by Kraken (in our case, the latter was replaced with  
566 Kraken2+Bracken assessment of the raw reads). Samples that failed the stringent criteria  
567 were divided into two groups. Group 1 were subjected to “relaxed criteria”, which included  
568 assemblies of 4 Mb - 5.8 Mb overall length, species purity of 90% or more, N50 >10,000, and  
569 fewer than 2,000 contigs. Group 2 included samples that had less than 70% *Salmonella* by  
570 original assessment, but produced assemblies passing the stringent criteria from “cleaned up”  
571 reads obtained by keeping only raw reads assigned *S. enterica* by Kraken2 + Bracken.

572 Assembled *Salmonella* genomes were annotated using Prokka v1.13.7<sup>7</sup> using a a custom  
573 protein database generated from *S. enterica* pan-genome analysis. Additionally, *Salmonella*  
574 assemblies were *in silico* serotyped using command line SISTR v1.0.2<sup>8</sup> and assigned  
575 sequence type using mlst v2.11<sup>9</sup> (<https://github.com/tseemann/mlst>). We have used cgMLST  
576 serovar assignment provided by SISTR for all further classification and comparison with  
577 metadata. Preliminary resistance and virulence gene profiling was done using Abricate v0.9.8  
578 (<https://github.com/tseemann/abricate>). All processing scripts detailing command settings and  
579 custom datasets are available at [https://github.com/apredeus/10k\\_genomes](https://github.com/apredeus/10k_genomes).

580 Data distribution was carried out by sharing packages through links created at the Centre for  
581 Genomic Research, University of Liverpool (UK). The packages contained sequencing stats,  
582 raw (untrimmed) fastq read files, assemblies, and a text files with information about serovar  
583 and sequence type details. All the processed reads and assemblies were deposited in the  
584 European Nucleotide Archive using the online portal Collaborative Open Plant Omics (COPO;  
585 <https://copo-project.org/copo>) under the project accession number PRJEB35182  
586 (ERP118197). COPO is an online portal for the description, storage and submission of  
587 publication data. The COPO wizards allow users to describe their data using ontologies to link  
588 and suggest metadata to include based on past submissions and similar projects. This enables  
589 meaningful description and therefore easy retrieval of the data in addition to standardising the  
590 format, thereby removing most of the hassle from data submission. Individual accession  
591 numbers are listed in Supplementary Table 3.

#### 592 ***Code availability***

593 Our code is available as open source (GPL v3 license) at  
594 [https://github.com/apredeus/10k\\_genomes](https://github.com/apredeus/10k_genomes)

#### 595 ***Data availability***

596 All sequencing datasets used in this study are publicly available in the European Nucleotide  
597 Archive under the project accession number PRJEB35182 (ERP118197). Individual accession  
598 numbers are listed in Supplementary Table 3.



599 **References**

- 600 1. Wood, D. E., Lu, J. & Langmead, B. Improved metagenomic analysis with Kraken 2.  
601 *Genome Biol.* **20**, 1–13 (2019).
- 602 2. Lu, J., Breitwieser, F. P., Thielen, P. & Salzberg, S. L. Bracken: Estimating species  
603 abundance in metagenomics data. *PeerJ Comput. Sci.* **2017**, 1–17 (2017).
- 604 3. Langmead, B. & Salzberg, S. L. Fast gapped-read alignment with Bowtie 2. *Nat.*  
605 *Methods* **9**, 357–359 (2012).
- 606 4. Wick, R. R., Judd, L. M., Gorrie, C. L. & Holt, K. E. Unicycler: Resolving bacterial  
607 genome assemblies from short and long sequencing reads. *PLoS Comput. Biol.* **13**,  
608 e1005595 (2017).
- 609 5. Bolger, A. M., Lohse, M. & Usadel, B. Trimmomatic: A flexible trimmer for Illumina  
610 sequence data. *Bioinformatics* **30**, 2114–2120 (2014).
- 611 6. Alikhan, N.-F., Zhou, Z., Sergeant, M. J. & Achtman, M. A genomic overview of the  
612 population structure of *Salmonella*. *PLoS Genet.* **14**, e1007261 (2018).
- 613 7. Seemann, T. Prokka: rapid prokaryotic genome annotation. *Bioinformatics* **30**, 2068–  
614 2069 (2014).
- 615 8. Yoshida, C. E. *et al.* The *Salmonella In Silico* Typing Resource (SISTR): An Open Web-  
616 Accessible Tool for Rapidly Typing and Subtyping Draft *Salmonella* Genome  
617 Assemblies. *PLoS One* **11**, e0147101 (2016).
- 618 9. Jolley, K. A. & Maiden, M. C. J. BIGSdb: Scalable analysis of bacterial genome variation  
619 at the population level. *BMC Bioinformatics* **11**, (2010).
